# Supplementary material
Source: PubMed Central journal article supplement (PMC6469295)
Supplement: dyy270_supplementary_data.pdf [file dyy270_supplementary_data.pdf]

**Supplemental Table 1. Intake of nutrients involved in folate-mediated one-carbon metabolism and time to diagnosis of endometrial cancer, associations stratified by multivitamin and alcohol use at enrollment: the NIH-AARP Diet and Health Study**

|                                                   | Multivitamin Use |             |                 |             | P <sup>2</sup> | Alcohol Use     |             |                 |             | P <sup>2</sup> |
|---------------------------------------------------|------------------|-------------|-----------------|-------------|----------------|-----------------|-------------|-----------------|-------------|----------------|
|                                                   | Non-Users        |             | Users           |             |                | Non-Users       |             | Users           |             |                |
|                                                   | HR <sup>1</sup>  | 95% CI      | HR <sup>1</sup> | 95% CI      |                | HR <sup>1</sup> | 95% CI      | HR <sup>1</sup> | 95% CI      |                |
| <b>Total Folate (post-fortification)</b>          |                  |             |                 |             | 0.89           |                 |             |                 |             | 0.54           |
| Q1                                                | Reference        |             | Reference       |             |                | Reference       |             | Reference       |             |                |
| Q2                                                | 1.15             | (0.93–1.41) | 1.06            | (0.88–1.27) |                | 1.23            | (0.95–1.58) | 1.05            | (0.89–1.23) |                |
| Q3                                                | 1.13             | (0.92–1.40) | 1.06            | (0.88–1.27) |                | 1.07            | (0.82–1.39) | 1.09            | (0.93–1.29) |                |
| Q4                                                | 1.12             | (0.90–1.38) | 1.08            | (0.90–1.30) |                | 1.17            | (0.90–1.51) | 1.07            | (0.91–1.26) |                |
| Q5                                                | 1.27             | (1.03–1.58) | 1.10            | (0.91–1.32) |                | 1.35            | (1.04–1.74) | 1.09            | (0.93–1.30) |                |
| <b>Natural Folate</b>                             |                  |             |                 |             | 0.56           |                 |             |                 |             | 0.16           |
| Q1                                                | Reference        |             | Reference       |             |                | Reference       |             | Reference       |             |                |
| Q2                                                | 1.32             | (1.08–1.62) | 1.14            | (0.95–1.38) |                | 1.33            | (1.03–1.73) | 1.18            | (1.00–1.39) |                |
| Q3                                                | 1.33             | (1.08–1.63) | 1.08            | (0.90–1.30) |                | 1.45            | (1.12–1.87) | 1.08            | (0.92–1.27) |                |
| Q4                                                | 1.21             | (0.98–1.50) | 1.18            | (0.99–1.42) |                | 1.20            | (0.92–1.57) | 1.19            | (1.01–1.40) |                |
| Q5                                                | 1.33             | (1.07–1.65) | 1.16            | (0.97–1.40) |                | 1.48            | (1.15–1.92) | 1.13            | (0.95–1.34) |                |
| <b>Synthetic Folate (Folic Acid)</b>              |                  |             |                 |             | 0.62           |                 |             |                 |             | 0.24           |
| Q1                                                | Reference        |             | Reference       |             |                | Reference       |             | Reference       |             |                |
| Q2                                                | 1.12             | (0.90–1.38) | 1.14            | (0.95–1.36) |                | 1.34            | (1.04–1.74) | 1.07            | (0.91–1.25) |                |
| Q3                                                | 1.21             | (0.98–1.49) | 1.02            | (0.86–1.23) |                | 1.34            | (1.03–1.74) | 1.02            | (0.87–1.19) |                |
| Q4                                                | 1.05             | (0.85–1.31) | 1.06            | (0.89–1.27) |                | 1.10            | (0.84–1.45) | 1.05            | (0.90–1.24) |                |
| Q5                                                | 1.10             | (0.89–1.37) | 1.00            | (0.83–1.20) |                | 1.26            | (0.97–1.63) | 0.97            | (0.82–1.15) |                |
| <b>Pre-fortification Total Folate<sup>3</sup></b> |                  |             |                 |             | 0.32           |                 |             |                 |             | 0.3            |
| Q1                                                | Reference        |             | Reference       |             |                | Reference       |             | Reference       |             |                |
| Q2                                                | 1.08             | (0.88–1.32) | 1.04            | (0.87–1.25) |                | 1.32            | (1.02–1.71) | 0.97            | (0.83–1.14) |                |
| Q3                                                | 1.03             | (0.84–1.27) | 1.16            | (0.97–1.39) |                | 1.24            | (0.95–1.62) | 1.07            | (0.91–1.25) |                |
| Q4                                                | 1.24             | (1.01–1.52) | 1.08            | (0.90–1.30) |                | 1.27            | (0.97–1.65) | 1.10            | (0.93–1.29) |                |
| Q5                                                | 1.22             | (0.99–1.51) | 1.08            | (0.89–1.30) |                | 1.39            | (1.07–1.80) | 1.04            | (0.88–1.23) |                |
| <b>Vitamin B2</b>                                 |                  |             |                 |             | 0.74           |                 |             |                 |             | <0.001         |
| Q1                                                | Reference        |             | Reference       |             |                | Reference       |             | Reference       |             |                |
| Q2                                                | 1.03             | (0.84–1.28) | 1.05            | (0.87–1.26) |                | 1.00            | (0.75–1.32) | 1.05            | (0.90–1.24) |                |
| Q3                                                | 1.05             | (0.85–1.30) | 1.14            | (0.95–1.36) |                | 0.93            | (0.70–1.23) | 1.17            | (1.00–1.37) |                |
| Q4                                                | 1.16             | (0.94–1.43) | 1.08            | (0.90–1.30) |                | 1.41            | (1.09–1.83) | 1.00            | (0.85–1.18) |                |
| Q5                                                | 1.22             | (0.98–1.50) | 1.10            | (0.92–1.33) |                | 1.38            | (1.07–1.78) | 1.05            | (0.88–1.24) |                |
| <b>Vitamin B3</b>                                 |                  |             |                 |             | 0.93           |                 |             |                 |             | 0.5            |
| Q1                                                | Reference        |             | Reference       |             |                | Reference       |             | Reference       |             |                |
| Q2                                                | 1.08             | (0.88–1.32) | 1.10            | (0.92–1.31) |                | 1.09            | (0.86–1.39) | 1.07            | (0.92–1.26) |                |
| Q3                                                | 0.99             | (0.80–1.21) | 1.07            | (0.90–1.27) |                | 1.16            | (0.91–1.48) | 0.98            | (0.84–1.16) |                |
| Q4                                                | 0.98             | (0.80–1.21) | 0.97            | (0.81–1.16) |                | 0.97            | (0.75–1.25) | 0.97            | (0.82–1.13) |                |
| Q5                                                | 0.93             | (0.75–1.15) | 0.88            | (0.73–1.07) |                | 1.05            | (0.82–1.35) | 0.85            | (0.71–1.00) |                |
| <b>Vitamin B6</b>                                 |                  |             |                 |             | 0.39           |                 |             |                 |             | 0.25           |
| Q1                                                | Reference        |             | Reference       |             |                | Reference       |             | Reference       |             |                |
| Q2                                                | 1.21             | (0.99–1.50) | 1.01            | (0.83–1.21) |                | 1.29            | (0.99–1.68) | 1.03            | (0.87–1.21) |                |
| Q3                                                | 1.17             | (0.94–1.44) | 1.10            | (0.92–1.32) |                | 1.09            | (0.83–1.43) | 1.14            | (0.98–1.34) |                |
| Q4                                                | 1.14             | (0.92–1.41) | 1.07            | (0.89–1.28) |                | 1.26            | (0.96–1.64) | 1.03            | (0.88–1.22) |                |
| Q5                                                | 1.43             | (1.15–1.76) | 1.12            | (0.93–1.34) |                | 1.41            | (1.09–1.82) | 1.17            | (0.99–1.39) |                |
| <b>Vitamin B12</b>                                |                  |             |                 |             | 0.84           |                 |             |                 |             | 0.33           |
| Q1                                                | Reference        |             | Reference       |             |                | Reference       |             | Reference       |             |                |
| Q2                                                | 1.05             | (0.85–1.31) | 1.03            | (0.85–1.23) |                | 0.95            | (0.73–1.25) | 1.06            | (0.90–1.25) |                |
| Q3                                                | 1.13             | (0.91–1.40) | 0.96            | (0.80–1.16) |                | 1.13            | (0.88–1.46) | 0.97            | (0.82–1.15) |                |
| Q4                                                | 1.21             | (0.98–1.50) | 1.09            | (0.91–1.30) |                | 1.27            | (0.99–1.63) | 1.07            | (0.91–1.26) |                |
| Q5                                                | 1.23             | (1.00–1.52) | 1.14            | (0.95–1.36) |                | 1.22            | (0.95–1.56) | 1.15            | (0.98–1.35) |                |
| <b>Methionine<sup>4</sup></b>                     |                  |             |                 |             |                |                 |             |                 |             | 0.51           |
| Q1                                                | Reference        |             | Reference       |             |                | Reference       |             | Reference       |             |                |
| Q2                                                |                  |             |                 |             |                | 1.02            | (0.78–1.33) | 1.02            | (0.86–1.20) |                |
| Q3                                                |                  |             |                 |             |                | 1.11            | (0.85–1.44) | 1.05            | (0.89–1.24) |                |
| Q4                                                |                  |             |                 |             |                | 1.16            | (0.90–1.49) | 0.99            | (0.84–1.17) |                |
| Q5                                                |                  |             |                 |             |                | 1.25            | (0.98–1.59) | 1.03            | (0.87–1.21) |                |

n=number; HR= hazard ratio; CI=confidence interval; Q1-Q5=calorie adjusted quintiles of intake for each nutrient (supplements not included)

<sup>1</sup>All models adjusted for: age, race, body mass index, smoking status, oral contraceptive use, menopausal hormone therapy use, caloric intake.

<sup>2</sup>P for heterogeneity from likelihood ratio tests comparing models with and without interaction terms for dichotomous B-vitamin supplement use or alcohol use and each dietary intake exposure

<sup>3</sup>Total dietary folate intake using estimates of food nutritional content before U.S. fortification (1996-1998).

<sup>4</sup>We did not stratify these models by multivitamin use because methionine is not a typical component of multivitamins
